# Supplementary material for: Improving the patient-reported outcome sections of clinical trial protocols: a mixed methods evaluation of educational workshops
Source: Springer Nature journal article supplement (doi:10.1007/s11136-022-03127-w), 2022-05-12
Supplement: MOESM1 [file 20396864]

## **Improving the patient-reported outcome sections of clinical trial protocols: a mixed methods evaluation of educational workshops**

Madeleine T King<sup>1\*</sup>, Margaret-Ann Tait<sup>1</sup>, Rachel Campbell<sup>1</sup>, Fabiola Müller<sup>1,2</sup>, Claudia Rutherford<sup>1,3</sup>, Corinna Beckmore<sup>4</sup>, Sophie Chima<sup>5</sup>, Danette Langbecker<sup>6</sup>, Joanne Shaw<sup>7</sup>, Rebecca Mercieca-Bebber<sup>8</sup>

1. University of Sydney, School of Psychology, Sydney Quality of Life Office, Australia
2. Department of Medical Psychology, Amsterdam University Medical Centers, University of Amsterdam, Amsterdam Public Health Research Institute, Amsterdam, the Netherlands
3. University of Sydney, Sydney Nursing School, Cancer Nursing Research Unit (CNRU), Sydney, Australia
4. Breast Cancer Trials, Newcastle, Australia
5. Department of General Practice, Faculty of Medicine, Dentistry and Health Sciences, Centre for Cancer Research, University of Melbourne, Victorian Comprehensive Cancer Centre, Melbourne, Vic., Australia.
6. Centre for Online Health, The University of Queensland, St Lucia, Australia
7. The University of Sydney, School of Psychology, Psycho-oncology Co-operative Research Group, Sydney Australia
8. University of Sydney, NHMRC Clinical Trial Centre, Sydney, Australia

\*[madeleine.king@sydney.edu.au](mailto:madeleine.king@sydney.edu.au)

**Online supplement 1: Workshop booklet table of contents and program**

# **PROtocol Checklist Workshop Quality of Life Office**

University of Sydney  
29-30 May 2014

Workshop Booklet

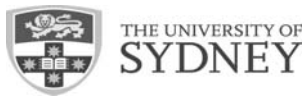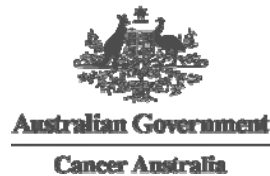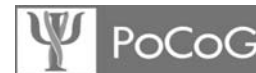

# Table of Contents

---

| Section                                                               | Page number |
|-----------------------------------------------------------------------|-------------|
| Program Outline                                                       | 4           |
| Biographies for Staff                                                 | 6           |
| Session 1: Introduction, Rationale, Objectives and Hypotheses         | 8           |
| Session 2: PRO measures                                               | 22          |
| Session 3: Utility measures                                           | 47          |
| Session 4: PRO questionnaire administration                           | 59          |
| Session 5: Missing data                                               | 77          |
| Session 6: Endpoints and Statistical Considerations                   | 94          |
| Session 7: Interpretation and Clinical significance of PRO results    | 109         |
| Session 8: Quality assurance, appendices and resources                | 116         |
| PRO Excerpts - PLUNG protocol (shared in confidence)                  | 126         |
| - HPV protocol (shared in confidence)                                 | 142         |
| - OUTBACK protocol (shared in confidence)                             | 156         |
| PROtocol Checklist                                                    | 160         |
| PRO <u>C</u> ompletion and <u>M</u> issing <u>D</u> ata (CoMiDa) Form | 162         |
| Participant List                                                      | 165         |
| References                                                            | 166         |

# Program Outline – Day 1

Thursday 29 May 2014

| Time         | Session                                                                                                                                                                                                                                                                                                                                                                                                                                                                       | Speaker    |
|--------------|-------------------------------------------------------------------------------------------------------------------------------------------------------------------------------------------------------------------------------------------------------------------------------------------------------------------------------------------------------------------------------------------------------------------------------------------------------------------------------|------------|
| 10.30am      | Registration and Morning Tea                                                                                                                                                                                                                                                                                                                                                                                                                                                  |            |
| <b>10.45</b> | <p><b>Session 1: Introduction, rationale, objectives and hypotheses</b></p> <p>Welcome, introductions and house-keeping</p> <p>Patient-Reported Outcomes (PROs) terminology and conceptual model</p> <p>Importance of the protocol</p> <p>Introducing the PROtocol Checklist –plus workshop format and overview</p> <p>The Protocol: Background and Rationale</p> <p>The Protocol: Objectives and Hypotheses</p> <p>Reflect, review, write – small groups or individually</p> | MK         |
| 12.30pm      | Lunch                                                                                                                                                                                                                                                                                                                                                                                                                                                                         |            |
| <b>1.00</b>  | <p><b>Session 2: PRO measures</b></p> <p>Available PRO questionnaires – what’s out there</p> <p>Choosing the best PRO questionnaire(s) to match your Objectives/Hypotheses</p> <p>Psychometric properties required</p> <p>Details of PRO questionnaires to include in your protocol</p> <p>Reflect, review, write – small groups or individually</p>                                                                                                                          | MK and RMB |
| 3.15         | Afternoon tea                                                                                                                                                                                                                                                                                                                                                                                                                                                                 |            |
| <b>3.30</b>  | <p><b>Session 3: Utility measures</b></p> <p>Economic evaluation and cost utility analysis (CUA) in clinical trials</p> <p>HRQoL, health utilities and QALYs</p> <p>Commonly used valuation methods – SG, TTO, DCE</p> <p>Multi-attribute utility instruments (MAUIs, e.g. EQ-5D, AQOL)</p>                                                                                                                                                                                   | RV - CREST |
| 5.00         | <b>Plenary discussion: Day 1 Q&amp;A</b>                                                                                                                                                                                                                                                                                                                                                                                                                                      | ALL        |
| 5.30         | End of Day 1                                                                                                                                                                                                                                                                                                                                                                                                                                                                  |            |

## Program Outline – Day 2

Friday 30 May 2014

| Time   | Session                                                                                                                                                                                                                                                                                                                                                                                                                                                                                                                                                                                                                                 | Speaker   |
|--------|-----------------------------------------------------------------------------------------------------------------------------------------------------------------------------------------------------------------------------------------------------------------------------------------------------------------------------------------------------------------------------------------------------------------------------------------------------------------------------------------------------------------------------------------------------------------------------------------------------------------------------------------|-----------|
| 9.00am | <p><b>Session 4: PRO questionnaire administration</b></p> <p>Inclusion and exclusion criteria specific to PRO assessment<br/>Administration of PRO questionnaires – place and mode of administration<br/>Timing of PRO assessments<br/>Reflect, review, write – small groups or individually</p>                                                                                                                                                                                                                                                                                                                                        | MK        |
| 11.00  | Morning Tea                                                                                                                                                                                                                                                                                                                                                                                                                                                                                                                                                                                                                             |           |
| 11.15  | <p><b>Session 5: Missing data - statistics and logistics</b></p> <p>The effects of missing data on power<br/>The effects of missing data on bias<br/>Types of missingness<br/>Collection of auxiliary data<br/>Elements of prevention<br/>Reflect, review, write – small groups or individually</p>                                                                                                                                                                                                                                                                                                                                     | DC and MK |
| 1.00pm | Lunch                                                                                                                                                                                                                                                                                                                                                                                                                                                                                                                                                                                                                                   |           |
| 1.30   | <p><b>Session 6: Endpoints and Statistical considerations</b></p> <p>Endpoints</p> <ul style="list-style-type: none"> <li>• Questionnaire scoring</li> <li>• Methods for deriving PRO endpoints</li> <li>• Analysis metric</li> <li>• Responder definitions</li> </ul> <p>Statistical considerations</p> <ul style="list-style-type: none"> <li>• Power/sample size calculations</li> <li>• Minimal important difference</li> <li>• Statistical analysis</li> <li>• Assessment of missing data</li> <li>• Handling missing data</li> <li>• Multiple comparisons</li> </ul> <p>Reflect, review, write – small groups or individually</p> | DC        |
| 3.00   | Afternoon tea                                                                                                                                                                                                                                                                                                                                                                                                                                                                                                                                                                                                                           |           |
| 3.15   | <p><b>Session 7: Interpretation and Clinical significance of PRO results</b></p> <p>Why PRO results are challenging to interpret<br/>Aids to interpretation - Effect sizes, minimally important difference &amp; clinical anchors</p>                                                                                                                                                                                                                                                                                                                                                                                                   | MK        |
| 3.50   | <p><b>Session 8: Quality assurance, appendices and resources</b></p> <p>How to get the best quality data – tips and resources</p>                                                                                                                                                                                                                                                                                                                                                                                                                                                                                                       | RMB       |
| 4.10   | <p><b>Plenary discussion: Day 2 Q&amp;A</b></p> <p>Workshop evaluation</p>                                                                                                                                                                                                                                                                                                                                                                                                                                                                                                                                                              | ALL       |
| 4.30   | End of Day 2                                                                                                                                                                                                                                                                                                                                                                                                                                                                                                                                                                                                                            |           |
