# Supplementary material for: Improving the patient-reported outcome sections of clinical trial protocols: a mixed methods evaluation of educational workshops
Source: Springer Nature journal article supplement (doi:10.1007/s11136-022-03127-w), 2022-05-12
Supplement: MOESM4 [file 20396864]

## **Improving the patient-reported outcome sections of clinical trial protocols: a mixed methods evaluation of educational workshops**

Madeleine T King<sup>1\*</sup>, Margaret-Ann Tait<sup>1</sup>, Rachel Campbell<sup>1</sup>, Fabiola Müller<sup>1,2</sup>, Claudia Rutherford<sup>1,3</sup>, Corinna Beckmore<sup>4</sup>, Sophie Chima<sup>5</sup>, Danette Langbecker<sup>6</sup>, Joanne Shaw<sup>7</sup>, Rebecca Mercieca-Bebber<sup>8</sup>

1. University of Sydney, School of Psychology, Sydney Quality of Life Office, Australia
2. Department of Medical Psychology, Amsterdam University Medical Centers, University of Amsterdam, Amsterdam Public Health Research Institute, Amsterdam, the Netherlands
3. University of Sydney, Sydney Nursing School, Cancer Nursing Research Unit (CNRU), Sydney, Australia
4. Breast Cancer Trials, Newcastle, Australia
5. Department of General Practice, Faculty of Medicine, Dentistry and Health Sciences, Centre for Cancer Research, University of Melbourne, Victorian Comprehensive Cancer Centre, Melbourne, Vic., Australia.
6. Centre for Online Health, The University of Queensland, St Lucia, Australia
7. The University of Sydney, School of Psychology, Psycho-oncology Co-operative Research Group, Sydney Australia
8. University of Sydney, NHMRC Clinical Trial Centre, Sydney, Australia

\*[madeleine.king@sydney.edu.au](mailto:madeleine.king@sydney.edu.au)

**Online supplement 4: Long-term research practice survey**

# Review of the Quality of Life Office PROtocol Checklist Workshop

The Quality of Life Office is supported by Cancer Australia to support the cancer clinical trials groups (CCTGs) to include patient reported outcomes in the research studies.

As part of this service, we have been running an annual PROtocol Checklist Workshop since 2011 to assist CCTG members to develop the quality of life and patient-reported outcome aspects of their trial protocols and to develop expertise among these members. Across all 7 workshops, 107 participants have attended.

We are administering this survey to obtain feedback on the long-term impact of our workshop. Please complete the short survey below - it is completely anonymous. It should take 5 minutes and will help us to improve our services in the future. Some of the questions relate to the workshop, while others relate to the PROtocol Checklist.

The checklist is available here, or can be accessed via the QOL Resources web-page:  
<http://www.pocog.org.au/content.aspx?page=qolresources>.

Do you recall attending the Quality of Life Office Protocol Checklist Workshop?  Yes  No

What year did you attend the PROtocol Checklist Workshop? (this was on your email invitation)  2011  2012  2013  2014  2015  2016  2017

## Since the workshop, have you used the Quality of Life PROtocol Checklist:

|                                                                                                    | yes                   | no                    |
|----------------------------------------------------------------------------------------------------|-----------------------|-----------------------|
| In developing new protocols ?                                                                      | <input type="radio"/> | <input type="radio"/> |
| In amending existing protocols?                                                                    | <input type="radio"/> | <input type="radio"/> |
| In other aspects of PRO/QOL studies? e.g. implementation, analysis, interpretation, reporting, etc | <input type="radio"/> | <input type="radio"/> |

How did you use the checklist?

\_\_\_\_\_

What were the barriers to using the checklist?

\_\_\_\_\_

---

How useful do you think this checklist would be if you were to develop a new study with patient-reported outcomes?

Not at all

Very useful

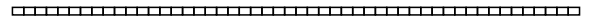

*(Place a mark on the scale above)*

---

Other comments on the PROtocol Checklist Workshop and/or the PROtocol Checklist

---
