# Supplementary material for: Improving the patient-reported outcome sections of clinical trial protocols: a mixed methods evaluation of educational workshops
Source: Springer Nature journal article supplement (doi:10.1007/s11136-022-03127-w), 2022-05-12
Supplement: MOESM7 [file 20396864]

## **Improving the patient-reported outcome sections of clinical trial protocols: a mixed methods evaluation of educational workshops**

Madeleine T King<sup>1\*</sup>, Margaret-Ann Tait<sup>1</sup>, Rachel Campbell<sup>1</sup>, Fabiola Müller<sup>1,2</sup>, Claudia Rutherford<sup>1,3</sup>, Corinna Beckmore<sup>4</sup>, Sophie Chima<sup>5</sup>, Danette Langbecker<sup>6</sup>, Joanne Shaw<sup>7</sup>, Rebecca Mercieca-Bebber<sup>8</sup>

1. University of Sydney, School of Psychology, Sydney Quality of Life Office, Australia
2. Department of Medical Psychology, Amsterdam University Medical Centers, University of Amsterdam, Amsterdam Public Health Research Institute, Amsterdam, the Netherlands
3. University of Sydney, Sydney Nursing School, Cancer Nursing Research Unit (CNRU), Sydney, Australia
4. Breast Cancer Trials, Newcastle, Australia
5. Department of General Practice, Faculty of Medicine, Dentistry and Health Sciences, Centre for Cancer Research, University of Melbourne, Victorian Comprehensive Cancer Centre, Melbourne, Vic., Australia.
6. Centre for Online Health, The University of Queensland, St Lucia, Australia
7. The University of Sydney, School of Psychology, Psycho-oncology Co-operative Research Group, Sydney Australia
8. University of Sydney, NHMRC Clinical Trial Centre, Sydney, Australia

\*[madeleine.king@sydney.edu.au](mailto:madeleine.king@sydney.edu.au)

**Online supplement 7: Inter-rater reliability - Weighted Kappa (linear weights)**

| Sub-item no. | Descriptive label                                                                                                                                                                                       | Weighted Kappa    | P value | 95% CI       |
|--------------|---------------------------------------------------------------------------------------------------------------------------------------------------------------------------------------------------------|-------------------|---------|--------------|
| 1            | Specify the individual(s) responsible for the PRO content of the trial protocol.                                                                                                                        | .000 <sup>a</sup> | /       | /            |
| 2            | In the protocol summary - Identify specific PRO endpoint(s), specifying key PRO construct(s)/domain(s), time-point(s), analysis metric(s). (i.e. change in score)                                       | 0.524             | <.001*  | 0.294;0.755  |
| 3            | In the protocol summary - PRO assessment included in the study schema / assessment schedule.                                                                                                            | 0.182             | 0.375   | -0.214;0.577 |
| 4            | Summarize PRO findings of past relevant studies.                                                                                                                                                        | 0.349             | .025*   | 0.056;0.642  |
| 5            | Describe the rationale for PRO assessment.                                                                                                                                                              | 0.471             | .002*   | 0.218;0.724  |
| 6            | Describe the PRO specific research question.                                                                                                                                                            | 0.466             | .002*   | 0.224;0.708  |
| 7            | State specific PRO objectives or hypotheses (including relevant PRO concepts/domains).                                                                                                                  | 0.129             | 0.326   | -0.167;0.425 |
| 8            | Do the stated PRO objectives/hypotheses include time-points?                                                                                                                                            | 0.45              | .003*   | 0.138;0.762  |
| 9            | Specify any PRO-specific eligibility criteria (e.g., language/reading requirements or pre-randomization completion of PRO).                                                                             | 0.494             | .012*   | 0.165;0.823  |
| 10           | If PROs will not be collected in the entire study sample, provide a rationale and describe the method for obtaining the PRO subsample. (If PROs are collected in the entire sample, then rate as 'N/A') | 0.516             | .001*   | 0.088;0.943  |
| 11           | Specify the PRO concepts/domains used to evaluate the intervention (e.g., overall HRQOL, specific domain, specific symptom).                                                                            | 0.358             | .007*   | 0.129;0.587  |
| 12           | Justify the PRO instrument to be used.                                                                                                                                                                  | 0.316             | .007*   | 0.053;0.579  |
| 13           | Describe the PRO instrument in terms of domains, number of items, recall period, instrument scaling/scoring (eg, range and direction of scores indicating a good/poor outcome).                         | 0.401             | .001*   | 0.115;0.686  |
| 14           | Evidence of PRO instrument measurement properties, interpretation guidelines, and patient acceptability/burden should be provided or cited if available, ideally in the population of interest.         | 0.41              | .003*   | 0.161;0.660  |
| 15           | State whether the measure will be used in accordance with any user manual and specify and justify deviations if planned.                                                                                | 0.523             | .003*   | 0.156;0.889  |
| 16           | Include a data collection plan outlining the permitted mode(s) of administration (e.g., paper, telephone, electronic, other).                                                                           | 0.674             | <.001*  | 0.458;0.890  |
| 17           | Specify who is responsible for delivering PRO questionnaires to patients and retrieving completed questionnaires from them, or if online, who is responsible for sending reminders.                     | 0.464             | .002*   | 0.220;0.708  |
| 18           | Specify PRO data collection setting (e.g., clinic, home, other).                                                                                                                                        | 0.607             | .004*   | 0.261;0.953  |
| 19           | Specify PRO data collection and management strategies for minimising avoidable missing data.                                                                                                            | 0.429             | .003*   | 0.185;0.673  |
| 20           | Specify what should be done when PRO assessments are missed, including contingency plans for following up patients who miss PRO assessments and who is responsible for implementing them.               | 0.537             | <.001*  | 0.356;0.718  |
| 21           | Specify whether more than one language version will be used.                                                                                                                                            | 0.397             | .018*   | 0.113;0.680  |

| Sub-item no. | Descriptive label                                                                                                                                                                                                                                                                                                                                                                                                                                                                                                                                | Weighted Kappa | P value | 95% CI       |
|--------------|--------------------------------------------------------------------------------------------------------------------------------------------------------------------------------------------------------------------------------------------------------------------------------------------------------------------------------------------------------------------------------------------------------------------------------------------------------------------------------------------------------------------------------------------------|----------------|---------|--------------|
| 22           | If a translation will be used, state whether it was developed using currently recommended methods. (If only one language version will be used, then rate as 'N/A')                                                                                                                                                                                                                                                                                                                                                                               | 0.366          | .026*   | -0.076;0.808 |
| 23           | Where the trial context requires someone other than the trial participant to answer on their behalf (a proxy reported outcome), state and justify this. Provide/cite evidence of the validity of proxy assessment if available. (If there are no proxy assessments, then rate as 'N/A')                                                                                                                                                                                                                                                          | 0.697          | <.001*  | 0.420;0.973  |
| 24           | Include a schedule of PRO assessments, specifying which measures will be used at each assessment.                                                                                                                                                                                                                                                                                                                                                                                                                                                | 0.126          | 0.461   | -0.383;0.635 |
| 25           | Provide a rationale for the assessment time points.                                                                                                                                                                                                                                                                                                                                                                                                                                                                                              | 0.139          | 0.345   | -0.173;0.450 |
| 26           | It is good practice to do the initial PRO assessment prior to randomization. If initial PRO assessment occurs post-randomization, provide a justification. It is good practice to do the initial PRO assessment prior to randomization. If initial PRO assessment occurs post-randomization, provide a justification. (If initial assessment is pre-randomization, rate as '10'; if initial assessment is post-randomization with a justification, rate as '10'; if initial assessment is post-randomization with no justification, rate as '0') | 0.612          | <.001*  | 0.333;0.891  |
| 27           | Specify PRO assessment time windows.                                                                                                                                                                                                                                                                                                                                                                                                                                                                                                             | 0.212          | 0.101   | -0.060;0.483 |
| 28           | Specify whether PRO collection is prior to clinical assessments.                                                                                                                                                                                                                                                                                                                                                                                                                                                                                 | 0.389          | .006*   | 0.073;0.704  |
| 29           | If using multiple questionnaires, specify whether order of administration will be standardized. (If only one questionnaire will be used, then rate as 'N/A')                                                                                                                                                                                                                                                                                                                                                                                     | 0.745          | <.001*  | 0.415;1.074  |
| 30           | Describe the process of PRO assessment for participants who discontinue or deviate from their assigned intervention protocol.                                                                                                                                                                                                                                                                                                                                                                                                                    | 0.3            | .028*   | 0.015;0.584  |
| 31           | Specify where PRO questionnaire data will be stored.                                                                                                                                                                                                                                                                                                                                                                                                                                                                                             | 0.454          | .023*   | 0.096;0.812  |
| 32           | Specify security measures in place to ensure confidentiality of patient data.                                                                                                                                                                                                                                                                                                                                                                                                                                                                    | 0.268          | .042*   | 0.026;0.0510 |
| 33           | Specify what will happen to a patient's PRO data if that patient decides to exit the study.                                                                                                                                                                                                                                                                                                                                                                                                                                                      | 0.614          | .004*   | 0.127;1.101  |
| 34           | State whether or not PRO data will be monitored during the study to inform the clinical care of individual trial participants.                                                                                                                                                                                                                                                                                                                                                                                                                   | 0.834          | <.001*  | 0.511;1.150  |
| 35           | If PRO data will be monitored during the study to inform clinical care of individual participants, state how this will be managed in a standardized way. (If not monitored to inform clinical care, then rate as 'N/A')                                                                                                                                                                                                                                                                                                                          | 0.731          | <.001*  | 0.433;1.030  |
| 36           | If PRO data will be monitored during the study to inform clinical care of individual participants, describe how this process will be explained to participants, e.g., in the participant information sheet and consent form. (If not monitored to inform clinical care, then rate as 'N/A')                                                                                                                                                                                                                                                      | 0.642          | <.001*  | 0.338;0.947  |
| 37           | Describe methods for deriving PRO endpoints from PRO data.                                                                                                                                                                                                                                                                                                                                                                                                                                                                                       | 0.414          | .007*   | 0.164;0.664  |
| 38           | For each of the PRO concepts/domains used to evaluate the intervention, specify the analysis metric (e.g., change from baseline, final value, time to event).                                                                                                                                                                                                                                                                                                                                                                                    | 0.541          | <.001*  | 0.326;0.756  |
| 39           | For each of the PRO concepts/domains used to evaluate the intervention, specify the principal time point or period of interest.                                                                                                                                                                                                                                                                                                                                                                                                                  | 0.412          | .012*   | 0.127;0.697  |

| Sub-item no. | Descriptive label                                                                                                                                                                                                                                                                  | Weighted Kappa    | P value | 95% CI       |
|--------------|------------------------------------------------------------------------------------------------------------------------------------------------------------------------------------------------------------------------------------------------------------------------------------|-------------------|---------|--------------|
| 40           | Where possible, reference scoring manuals for summated scales from questionnaires (domain-specific &/or total), and methodological papers for composite endpoints (e.g. QTWiST).                                                                                                   | -0.073            | 0.648   | -0.186;0.040 |
| 41           | Describe PRO responder definitions (size and duration of benefit), where relevant.                                                                                                                                                                                                 | 0.13              | 0.399   | -0.175;0.436 |
| 42           | Where a PRO is the primary endpoint, state the required sample size (and how it was determined) and recruitment target (accounting for expected loss to follow-up). If sample size is not established based on PRO endpoint, then discuss the power of the principal PRO analyses. | 0.71              | <.001*  | 0.450;0.970  |
| 43           | State minimal important difference (with reference/s) – relevant to sample size calculations, responder definitions and interpreting clinical significance of results.                                                                                                             | 0.304             | 0.15    | -0.167;0.775 |
| 44           | State PRO analysis methods.                                                                                                                                                                                                                                                        | 0.452             | .002*   | 0.242;0.661  |
| 45           | State how missing data will be described.                                                                                                                                                                                                                                          | .000 <sup>a</sup> | /       | /            |
| 46           | Outline the methods for handling missing items and entire assessments (e.g., approach to imputation and sensitivity analyses).                                                                                                                                                     | 0.589             | <.001*  | 0.251;0.926  |
| 47           | State any plans for addressing multiplicity/type 1 ( $\alpha$ ) error.                                                                                                                                                                                                             | 0.592             | .002*   | 0.201;0.984  |
| 48           | Provide references for what is known about PROs (as per Background and Rationale section)                                                                                                                                                                                          | 0.469             | .022*   | 0.108;0.831  |
| 49           | Provide references for PRO data analyses and methods for handling missing data                                                                                                                                                                                                     | 0.353             | .030*   | -0.027;0.733 |
| 50           | Provide copies of PRO questionnaires.                                                                                                                                                                                                                                              | 0.897             | <.001*  | 0.700;1.093  |
| 51           | Provide evidence of permission to use PRO questionnaires (if permission not required, this is stated).                                                                                                                                                                             | 0.06              | 0.421   | -0.059;0.178 |
| 52           | Provide copies of the Patient Reported Outcomes (PRO) Completion and Missing Data (CoMiDa) Form – to record reasons for missing PRO data, which may inform analyses                                                                                                                | 1                 | <.001*  | 1.00;1.00    |
| 53           | Provide sample Patient Information Sheet and Consent form (in which the patient is informed about the requirement and purpose of PRO questionnaires in this research, who has access to the PRO data and who to contact with questions).                                           | 0.577             | .008*   | 0.152;1.002  |

a. Could not be calculated because R1 rating is constant (i.e. all zeros)

\* indicates statistical significance
